# Supplementary material
Source: PubMed Central journal article supplement (PMC8991339)
Supplement: tpmd210980.SD1.pdf [file tpmd210980.SD1.pdf]

## Supplementary Material.

### Country-stratified data of *S. pneumoniae*-related burden and year of implementation of PCV vaccination policy

|            | City                  | Under-5 mortality (n, 2015 estimate) <sup>a</sup> | Childhood (U5) pneumonia mortality (n, 2015 estimate) <sup>a</sup> | Pneumococcal conjugate vaccine <sup>b</sup> (Year introduced) |
|------------|-----------------------|---------------------------------------------------|--------------------------------------------------------------------|---------------------------------------------------------------|
| Cambodia   | Phnom Penh            | 4 975                                             | 1 398                                                              | PCV13 (2015)                                                  |
| China      | Beijing               | 88 139                                            | 14 862                                                             | Pending                                                       |
| Haiti      | Port-au-Prince        | 11 304                                            | 3 597                                                              | PCV13 (2018)                                                  |
| India      | Lucknow/<br>Pune-Vadu | 505 146                                           | 143 228                                                            | PCV13 (2017)                                                  |
| Madagascar | Antananarivo          | 23 886                                            | 5 854                                                              | PCV10 (2012)                                                  |
| Mali       | Bamako                | 55 271                                            | 8 891                                                              | PCV13 (2011)                                                  |
| Mongolia   | Ulaanbaatar           | 792                                               | 196                                                                | PCV13 (2016)                                                  |
| Paraguay   | San Lorenzo           | 1 309                                             | 247                                                                | PCV10 (2012)                                                  |

<sup>a</sup>Estimate from Liu L et al. *Lancet* 2016; 388:3027-35. <sup>b</sup>International Vaccine Access Center (IVAC), Johns Hopkins Bloomberg School of Public Health. Vaccine Information Management System (VIMS). VIEW-hub tool. 2020. View-hub.org.

### Definition of pneumonia cases and controls

Eligible cases presented the following clinical features:

- (1) cough and/or dyspnea, and
- (2) tachypnea, as delineated by the WHO (breathing rate  $\geq 50$  cycles per minute in children between 2 and 12 months of age and  $\geq 40$  cycles per minute in children between 12 and 59 months of age), and
- (3) first symptoms appearing within the last 14 days, and
- (4) radiological confirmation of pneumonia on chest X-ray, as defined per World Health Organization (WHO) guidelines [11].

Inclusion criteria for controls were:

- (1) no symptoms of respiratory illness/upper respiratory tract infection, and
- (2) between 2 and 60 months of age, and

(3) hospitalized for surgery or attending routine outpatient appointment at hospital site.

No specific quota of inclusion per day was used.

Supplementary Material Figure 1. Flow chart of the study

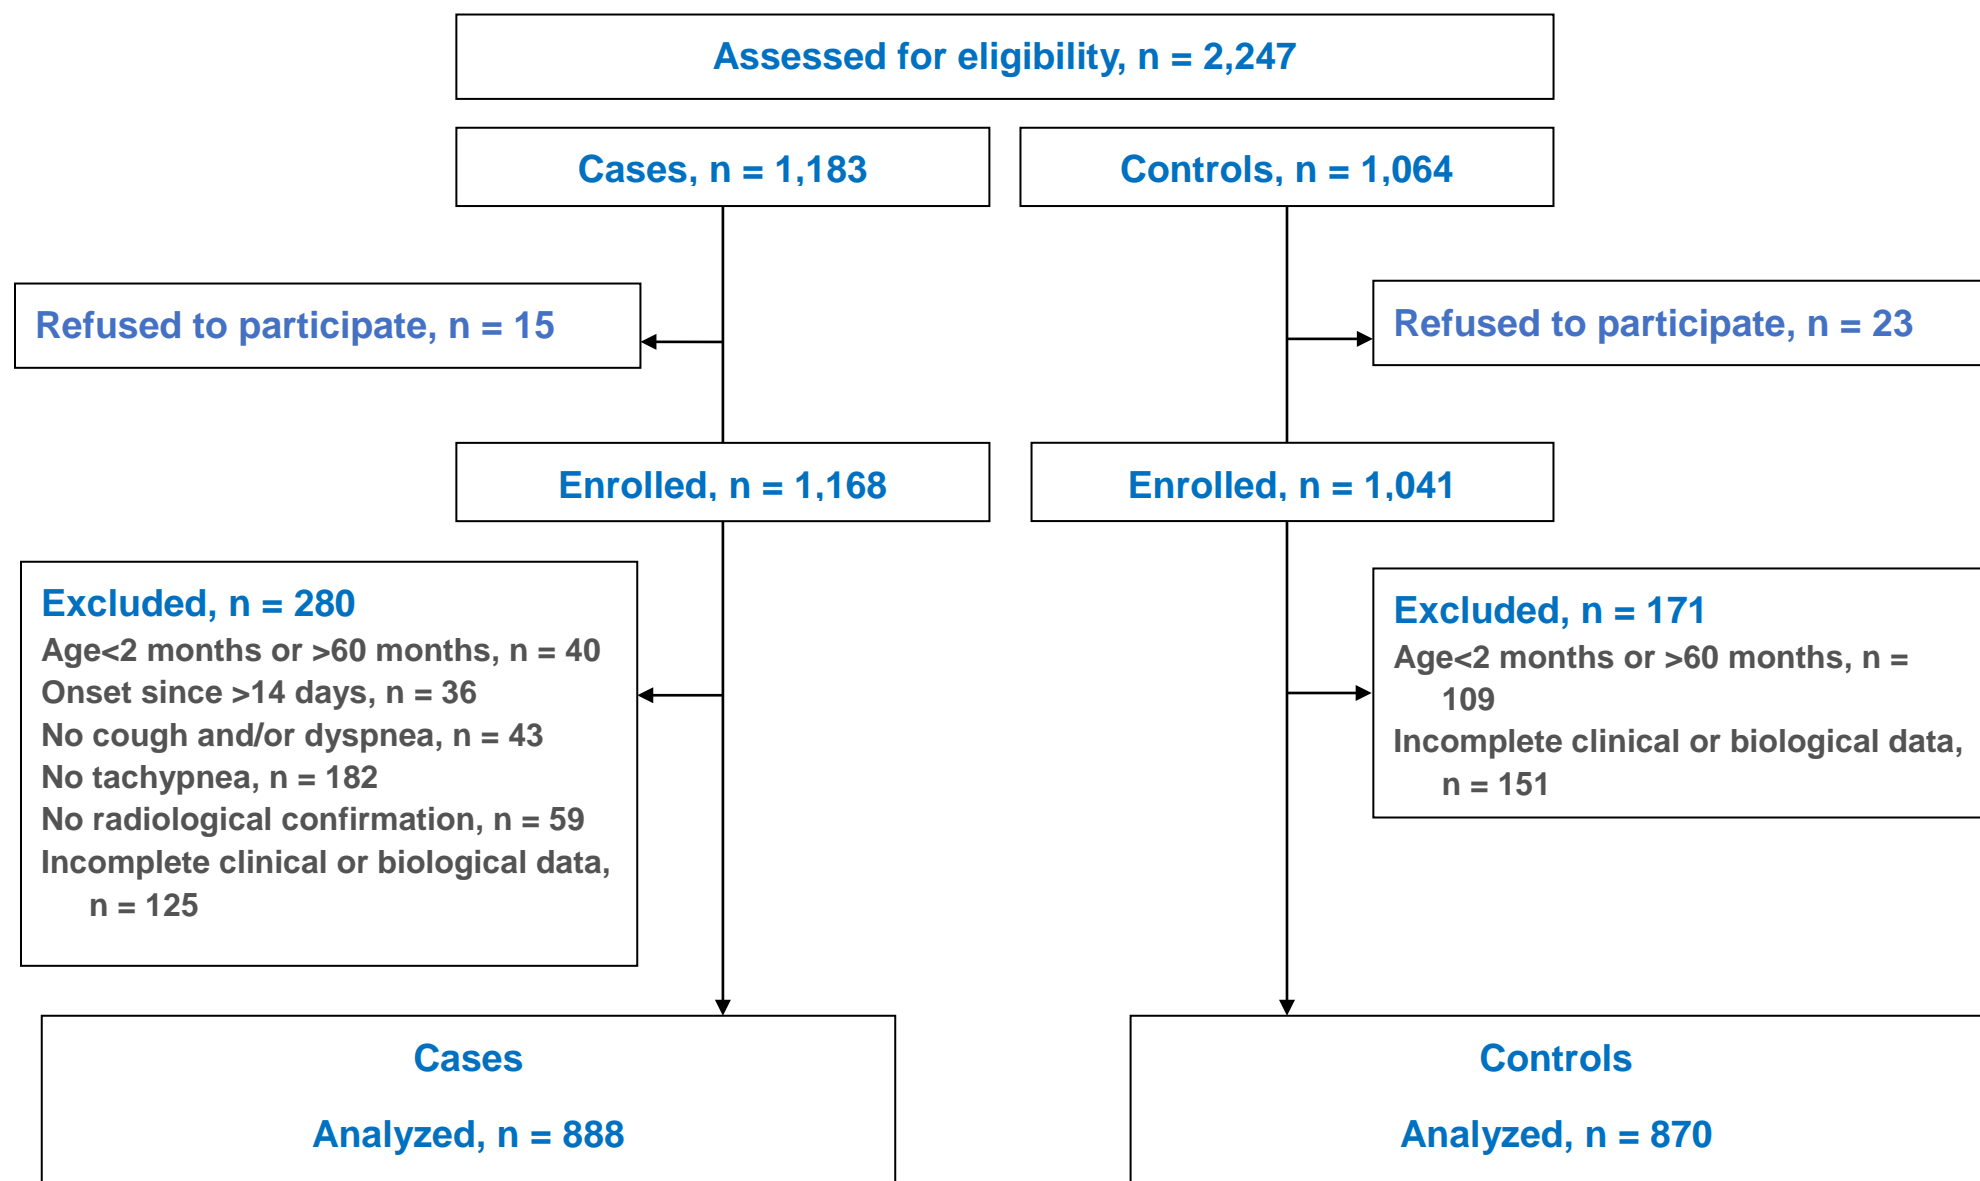

**Supplementary Material Figure 2. Site-stratified description of the number of bacteria and virus co-detected, by patient group, the GABRIEL Network pneumonia study, 2010 through 2014**

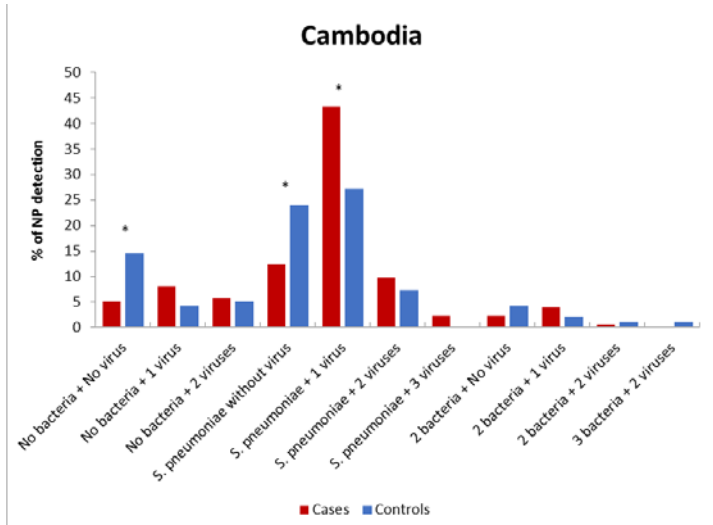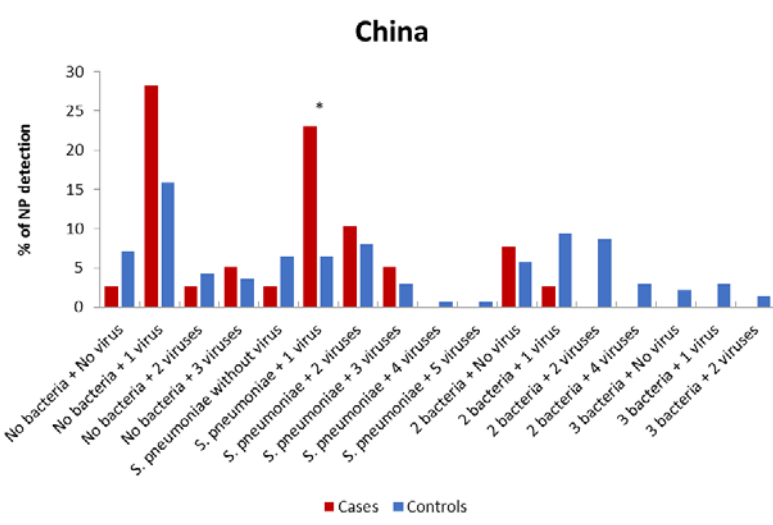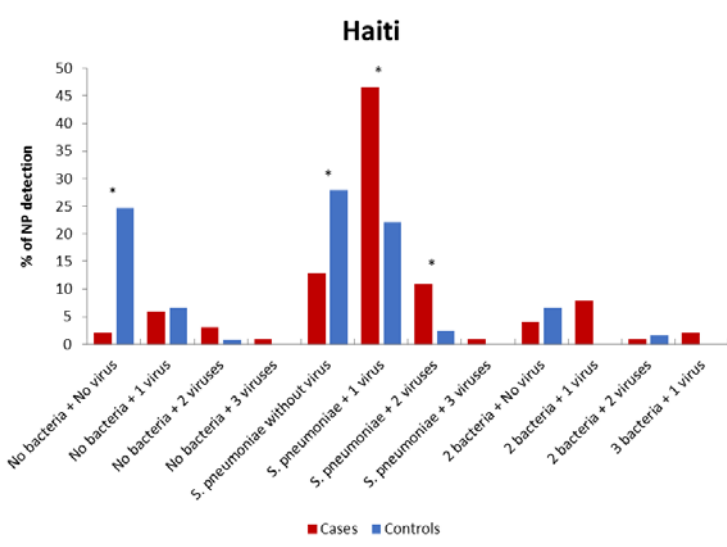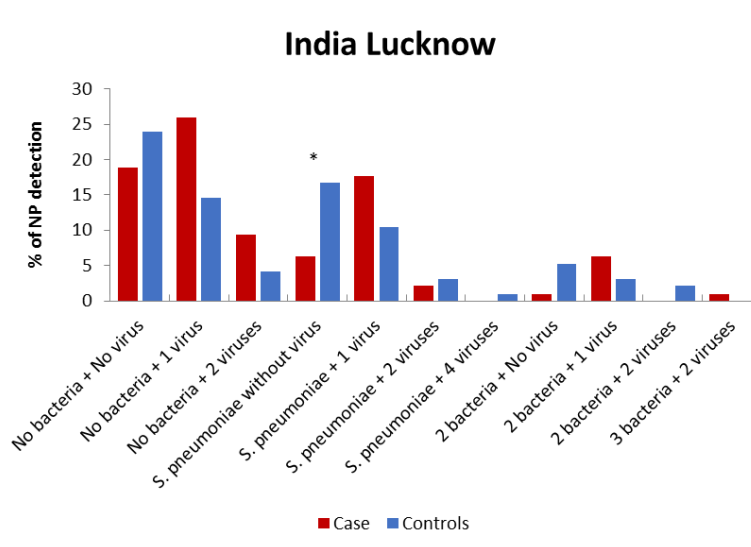

**Supplementary Material Figure 2 (continued). Site-stratified description of the number of bacteria and virus co-detected, by patient group, the GABRIEL Network pneumonia study, 2010 through 2014**

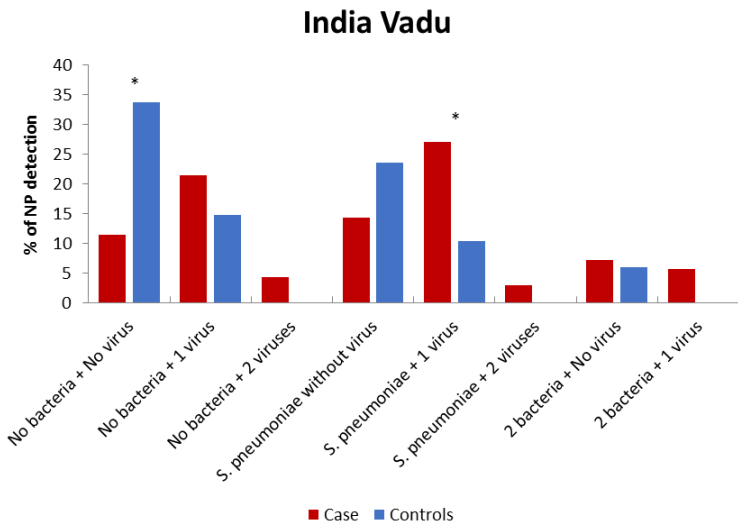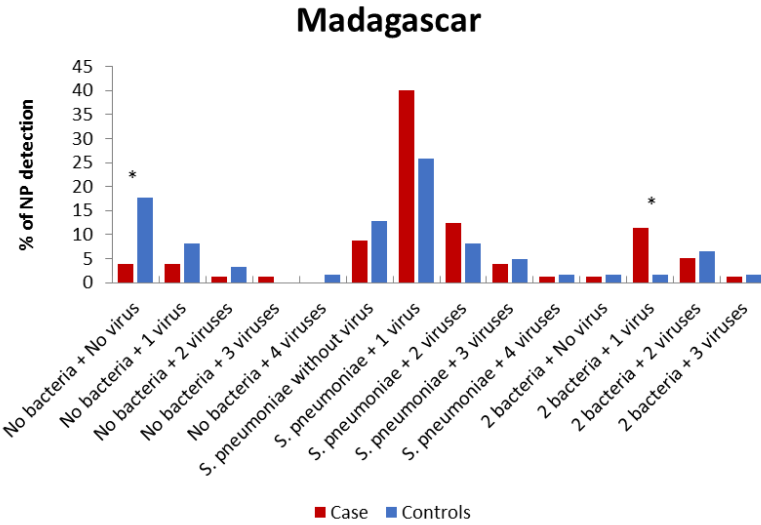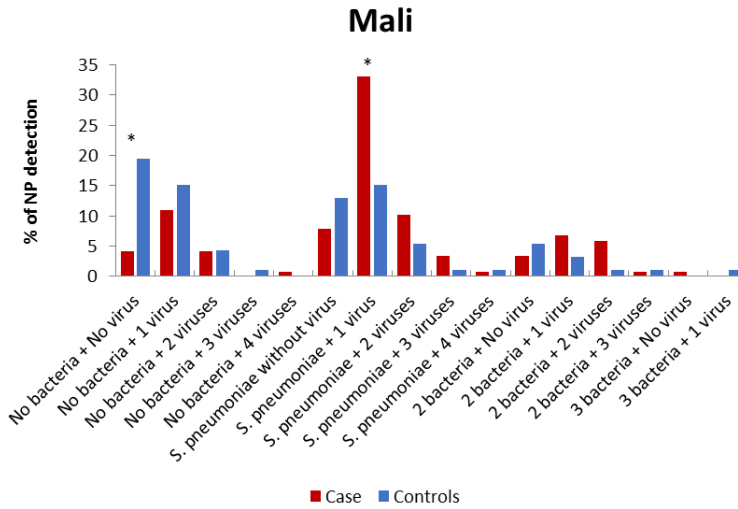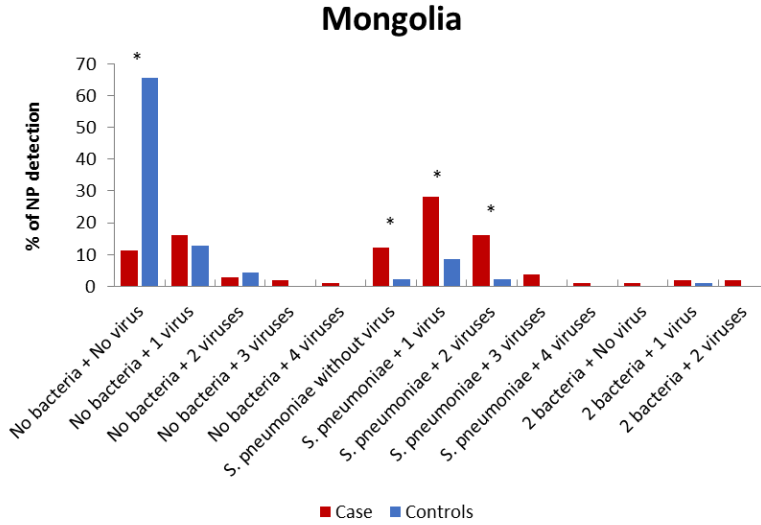

Supplementary Material Figure 2 (continued). Site-stratified description of the number of bacteria and virus co-detected, by patient group, the GABRIEL Network pneumonia study, 2010 through 2014

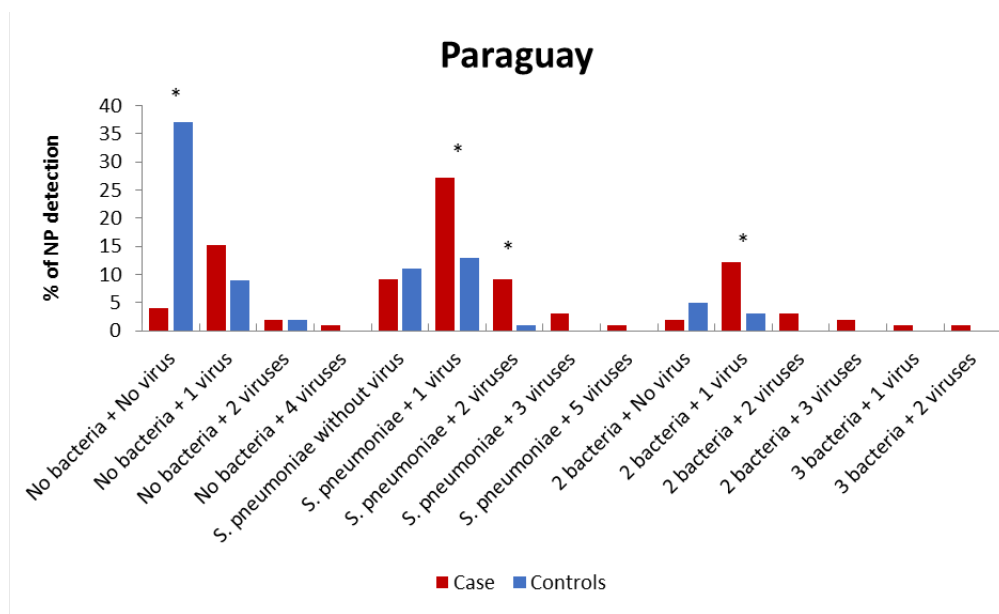

NOTE : \* :p<0.05

**Supplementary Material Table 1. Description of the excluded population, the GABRIEL Network pneumonia study, 2010 through 2014**

| Characteristics                                       | Overall (n=1,183)      |                        | P-value |
|-------------------------------------------------------|------------------------|------------------------|---------|
|                                                       | Excluded cases (n=295) | Included cases (n=888) |         |
| <b>Demographics on admission†</b>                     |                        |                        |         |
| Male gender                                           | 165/265 (62.3)         | 525/888 (59.4)         | 0.40    |
| Study site                                            |                        |                        | <0.001  |
| <i>Cambodia</i>                                       | 35/295 (11.9)          | 176/888 (19.8)         |         |
| <i>China</i>                                          | 139/295 (47.1)         | 39/888 (4.4)           |         |
| <i>Haiti</i>                                          | 38/295 (12.9)          | 101/888 (11.4)         |         |
| <i>India Lucknow</i>                                  | 6/295 (2.0)            | 96/888 (10.8)          |         |
| <i>India Vadu</i>                                     | 12/295 (4.1)           | 71/888 (8.0)           |         |
| <i>Madagascar</i>                                     | 51/295 (17.3)          | 80/888 (9.0)           |         |
| <i>Mali</i>                                           | 1/295 (0.3)            | 118/888 (13.3)         |         |
| <i>Mongolia</i>                                       | 12/295 (4.1)           | 108/888 (12.2)         |         |
| <i>Paraguay</i>                                       | 1/295 (0.3)            | 99/888 (11.2)          |         |
| Quarter of inclusion                                  |                        |                        | 0.39    |
| <i>January-March</i>                                  | 74/267 (27.7)          | 202/887 (22.8)         |         |
| <i>April-June</i>                                     | 54/267 (20.2)          | 180/887 (20.3)         |         |
| <i>July-September</i>                                 | 59/267 (22.1)          | 221/887 (24.9)         |         |
| <i>October-December</i>                               | 80/267 (30.0)          | 284/887 (32.0)         |         |
| Age, months, median (IQR)                             |                        | 19.8 (9.0-28.0)        | <0.001  |
| Age category                                          |                        |                        | 0.002   |
| <i>2 to 11 months</i>                                 | 85/260 (32.7)          | 333/888 (37.5)         |         |
| <i>12 to 23 months</i>                                | 57/260 (21.9)          | 256/888 (28.8)         |         |
| <i>24 to 60 months</i>                                | 118/260 (45.4)         | 299/888 (33.7)         |         |
| Weight, kg, median (IQR)                              | 11.0 (7.8-14.5)        | 9.0 (7.0-11.0)         | <0.001  |
| Height, cm, median (IQR)                              | 76 (66-90)             | 78.0 (68.0-88.0)       | 0.96    |
| Body mass index, median (IQR)                         | 15.9 (13.8-18.0)       | 15.1 (13.6-16.9)       | 0.012   |
| Mid-upper arm circumference, median (IQR)             | 14.0 (12.5-15.5)       | 14.0 (12.5-16.0)       | 0.76    |
| Weight-for-height Z-score ≤2 SD                       | 38/251 (15.1)          | 200/775 (25.8)         | 0.001   |
| Weight-for-height Z-score ≤3 SD                       | 14/251 (5.6)           | 92/775 (11.9)          | 0.004   |
| <b>Medical history†</b>                               |                        |                        |         |
| Heart condition                                       | 11/264 (4.2)           | 39/886 (4.4)           | 0.87    |
| Lung disease                                          | 27/205 (13.2)          | 105/704 (14.9)         | 0.53    |
| Tuberculosis                                          | 1/221 (0.5)            | 6/873 (0.7)            | 0.99    |
| Asthma                                                | 3/216 (1.4)            | 17/874 (2.0)           | 0.78    |
| Pneumonia                                             | 43/158 (27.2)          | 205/624 (32.9)         | 0.17    |
| HIV-positive                                          | 2/242 (0.8)            | 9/758 (1.9)            | 0.99    |
| Contracted a cold or pharyngitis during prior 2 weeks | 39/217 (18.0)          | 164/693 (23.7)         | 0.079   |
| Contracted influenza during prior 2 weeks             | 14/203 (6.9)           | 90/671 (13.4)          | 0.012   |
| Prior treatment of fever‡                             | 192/261 (73.6)         | 629/877 (71.7)         | 0.56    |
| Antibiotic usage history‡                             | 158/221 (71.5)         | 443/701 (63.2)         | 0.024   |
| PCV vaccination                                       | 1/86 (1.2)             | 21/614 (3.4)           | 0.50    |
| <b>Vital signs on admission</b>                       |                        |                        |         |

|                                              |                     |                  |        |
|----------------------------------------------|---------------------|------------------|--------|
| Temperature, °C, median (IQR)                | 38.0 (37.0-38.6)    | 38.3 (37.7-38.8) | <0.001 |
| Breathing rate, cycles/min, median (IQR)     | 38 (28-50)          | 54 (46-60)       | <0.001 |
| Cardiac rate, beats/min, median (IQR)        | 127.5 (114.5-140.5) | 136 (120.5-152)  | <0.001 |
| Systolic blood pressure, mmHg, median (IQR)  | 90 (85-100)         | 90 (84-98)       | <0.001 |
| Diastolic blood pressure, mmHg, median (IQR) | 60 (52-60)          | 60 (56-68)       | 0.039  |
| Arterial oxygen saturation, %, median (IQR)  | 97 (95-99)          | 95 (92-97)       | <0.001 |

---

NOTE: † Reported as number/number with available data (%), ‡ For the current illness, HIV: Human immunodeficiency virus,

IQR: Interquartile range, PCV: Pneumococcal conjugate vaccine, SD: Standard deviation



**Supplementary Material Table 1 (continued). Description of the excluded population, the GABRIEL Network pneumonia study, 2010 through 2014**

| Characteristics                                       | Overall (n=1,064)         |                           | P-value |
|-------------------------------------------------------|---------------------------|---------------------------|---------|
|                                                       | Excluded controls (n=194) | Included controls (n=870) |         |
| <b>Demographics on admission†</b>                     |                           |                           |         |
| Male gender                                           | 55/99 (55.6)              | 497/867 (57.3)            | 0.74    |
| Study site                                            |                           |                           |         |
| <i>Cambodia</i>                                       | 15/194 (7.7)              | 96/870 (11.0)             | <0.001  |
| <i>China</i>                                          | 0/194 (0.0)               | 138/870 (15.9)            |         |
| <i>Haiti</i>                                          | 30/194 (15.5)             | 122/870 (14.0)            |         |
| <i>India Lucknow</i>                                  | 8/194 (4.1)               | 96/870 (11.0)             |         |
| <i>India Vadu</i>                                     | 18/194 (9.3)              | 70/870 (8.1)              |         |
| <i>Madagascar</i>                                     | 72/194 (37.1)             | 62/870 (7.1)              |         |
| <i>Mali</i>                                           | 8/194 (4.1)               | 93/870 (10.7)             |         |
| <i>Mongolia</i>                                       | 43/194 (22.2)             | 93/870 (10.7)             |         |
| <i>Paraguay</i>                                       | 0/194 (0.0)               | 100/870 (11.5)            |         |
| Quarter of inclusion                                  |                           |                           | 0.021   |
| <i>January-March</i>                                  | 25/114 (21.9)             | 195/865 (22.5)            |         |
| <i>April-June</i>                                     | 11/114 (9.7)              | 180/865 (20.8)            |         |
| <i>July-September</i>                                 | 31/114 (27.2)             | 220/865 (25.4)            |         |
| <i>October-December</i>                               | 47/114 (41.2)             | 270/865 (31.2)            |         |
| Age, months, median (IQR)                             | 23.0 (10.0-36.0)          | 17.0 (9.0-33.0)           | 0.057   |
| Age category                                          |                           |                           | 0.39    |
| <i>2 to 11 months</i>                                 | 32/87 (36.8)              | 294/870 (33.8)            |         |
| <i>12 to 23 months</i>                                | 18/87 (20.7)              | 239/870 (27.5)            |         |
| <i>24 to 60 months</i>                                | 37/87 (42.5)              | 336/870 (38.9)            |         |
| Weight, kg, median (IQR)                              | 10.0 (8.0-13.0)           | 10.0 (7.5-13.0)           | 0.46    |
| Height, cm, median (IQR)                              | 80.0 (70.0-86.3)          | 76.0 (67.0-89.0)          | 0.057   |
| Body mass index, median (IQR)                         | 14.7 (13.7-15.6)          | 15.6 (14.1-17.2)          | 0.07    |
| Mid-upper arm circumference, median (IQR)             | 14.6 (13.0-16.4)          | 14.0 (13.0-16.0)          | 0.11    |
| Weight-for-height Z-score ≤2 SD                       | 25/98 (25.5)              | 161/835 (19.3)            | 0.14    |
| Weight-for-height Z-score ≤3 SD                       | 11/98 (11.2)              | 77/835 (9.2)              | 0.47    |
| <b>Medical history†</b>                               |                           |                           |         |
| Heart condition                                       | 0/99 (0.0)                | 11/767 (1.4)              | 0.23    |
| Lung disease                                          | 0/113 (0.0)               | 9/862 (1.0)               | 0.28    |
| Tuberculosis                                          | 0/113 (0.0)               | 10/855 (1.2)              | 0.25    |
| Asthma                                                | 0/112 (0.0)               | 3/853 (0.4)               | 0.53    |
| Pneumonia                                             | 0/73 (0.0)                | 2/795 (0.3)               | 0.67    |
| HIV-positive                                          | 3/93 (3.1)                | 10/819 (1.2)              | 0.14    |
| Contracted a cold or pharyngitis during prior 2 weeks | 7/98 (7.1)                | 26/756 (3.4)              | 0.073   |
| Contracted influenza during prior 2 weeks             | 4/97 (4.1)                | 6/750 (0.8)               | 0.004   |
| Prior treatment of fever‡                             | 30/107 (28.0)             | 83/830 (10.0)             | <0.001  |
| Prior antibiotic treatment‡                           | 19/81 (23.5)              | 201/720 (27.9)            | 0.39    |
| PCV vaccination                                       | 1/107 (0.9)               | 51/584 (8.7)              | 0.002   |

**Vital signs on admission**

|                                              |                  |                |        |
|----------------------------------------------|------------------|----------------|--------|
| Temperature, °C, median (IQR)                | 37.1 (36.5-37.5) | 36.8 (36.3-37) | 0.007  |
| Breathing rate, cycles/min, median (IQR)     | 31 (28-37)       | 32 (26-36)     | 0.64   |
| Cardiac rate, beats/min, median (IQR)        | 119 (100-130)    | 110 (100-122)  | 0.63   |
| Systolic blood pressure, mmHg, median (IQR)  | 90 (90-100)      | 90 (90-100)    | 0.36   |
| Diastolic blood pressure, mmHg, median (IQR) | 60 (60-70)       | 60 (54.5-60)   | 0.068  |
| Arterial oxygen saturation, %, median (IQR)  | 98 (96-99)       | 99 (97-100)    | <0.001 |

NOTE: † Reported as number/number with available data (%), ‡ For the current illness, HIV: Human immunodeficiency virus,

IQR: Interquartile range, PCV: Pneumococcal conjugate vaccine, SD: Standard deviation

**Supplementary Material Table 2. Comparison of clinical characteristics between pneumonia cases and controls in the entire population (N=1,758), the GABRIEL Network pneumonia study, 2010 through 2014**

| Characteristics                                            | Overall (n=1,758) |                  |         |
|------------------------------------------------------------|-------------------|------------------|---------|
|                                                            | Cases (n=888)     | Controls (n=870) | P-value |
| <b>Demographics on admission<sup>†</sup></b>               |                   |                  |         |
| Male gender                                                | 525/888 (59.4)    | 497/867 (57.3)   | 0.39    |
| Study site                                                 |                   |                  | <0.001  |
| <i>Cambodia</i>                                            | 176/888 (19.8)    | 96/870 (11.0)    |         |
| <i>China</i>                                               | 39/888 (4.4)      | 138/870 (15.9)   |         |
| <i>Haiti</i>                                               | 101/888 (11.4)    | 122/870 (14.0)   |         |
| <i>India Lucknow</i>                                       | 96/888 (10.8)     | 96/870 (11.0)    |         |
| <i>India Pune/Vadu</i>                                     | 71/888 (8.0)      | 70/870 (8.1)     |         |
| <i>Madagascar</i>                                          | 80/888 (9.0)      | 62/870 (7.1)     |         |
| <i>Mali</i>                                                | 118/888 (13.3)    | 93/870 (10.7)    |         |
| <i>Mongolia</i>                                            | 108/888 (12.2)    | 93/870 (10.7)    |         |
| <i>Paraguay</i>                                            | 99/888 (11.2)     | 100/870 (11.5)   |         |
| Quarter of inclusion                                       |                   |                  | 0.98    |
| <i>January-March</i>                                       | 202/887 (22.8)    | 195/865 (22.5)   |         |
| <i>April-June</i>                                          | 180/887 (20.3)    | 180/865 (20.8)   |         |
| <i>July-September</i>                                      | 221/887 (24.9)    | 220/865 (25.4)   |         |
| <i>October-December</i>                                    | 284/887 (32.0)    | 270/865 (31.2)   |         |
| Age, months, median (IQR)                                  | 19.8 (9.0-28.0)   | 17.0 (9.0-33.0)  | 0.03    |
| Age category                                               |                   |                  | 0.08    |
| <i>2 to 11 months</i>                                      | 333/888 (37.5)    | 294/870 (33.8)   |         |
| <i>12 to 23 months</i>                                     | 256/888 (28.8)    | 239/870 (27.5)   |         |
| <i>24 to 60 months</i>                                     | 299/888 (33.7)    | 336/870 (38.9)   |         |
| Weight, kg, median (IQR)                                   | 9.0 (7.0-11.0)    | 10.0 (7.5-13.0)  | <0.001  |
| Height, cm, median (IQR)                                   | 78.0 (68.0-88.0)  | 76.0 (67.0-89.0) | 0.73    |
| Body mass index, median (IQR)                              | 15.1 (13.6-16.9)  | 15.6 (14.1-17.2) | 0.006   |
| Mid-upper arm circumference, median (IQR)                  | 14.0 (12.5-16.0)  | 14.0 (13.0-16.0) | 0.18    |
| Weight-for-height Z-score ≤2 SD                            | 200/775 (25.8)    | 161/835 (19.3)   | 0.002   |
| Weight-for-height Z-score ≤3 SD                            | 92/775 (11.9)     | 77/835 (9.2)     | 0.08    |
| <b>Medical history<sup>†</sup></b>                         |                   |                  |         |
| Heart condition                                            | 39/886 (4.4)      | 11/767 (1.4)     | <0.001  |
| Lung disease                                               | 105/704 (14.9)    | 9/862 (1.0)      | <0.001  |
| Tuberculosis                                               | 6/873 (0.7)       | 10/855 (1.2)     | 0.3     |
| Asthma                                                     | 17/874 (2.0)      | 3/853 (0.4)      | 0.002   |
| Pneumonia                                                  | 205/624 (32.9)    | 2/795 (0.3)      | <0.001  |
| Other lung disease                                         | 24/694 (3.5)      | 7/770 (0.9)      | 0.001   |
| HIV-positive                                               | 9/758 (1.9)       | 10/819 (1.2)     | 0.95    |
| Contracted a cold or pharyngitis during prior 2 weeks      | 164/693 (23.7)    | 26/756 (3.4)     | <0.001  |
| Contracted influenza during prior 2 weeks                  | 90/671 (13.4)     | 6/750 (0.8)      | <0.001  |
| Prior treatment of fever <sup>‡</sup>                      | 629/877 (71.7)    | 83/830 (10.0)    | <0.001  |
| Prior antibiotic treatment <sup>‡</sup>                    | 443/701 (63.2)    | 201/720 (27.9)   | <0.001  |
| Urinary detection of antibiotics at admission <sup>‡</sup> | 482/684 (70.5)    | NA               |         |

|                                              |                  |                |        |
|----------------------------------------------|------------------|----------------|--------|
| PCV vaccination                              | 21/614 (3.4)     | 51/584 (8.7)   | <0.001 |
| <b>Vital signs on admission</b>              |                  |                |        |
| Temperature, °C, median (IQR)                | 38.3 (37.7-38.8) | 36.8 (36.3-37) | <0.001 |
| Breathing rate, cycles/min, median (IQR)     | 54 (46-60)       | 32 (26-36)     | <0.001 |
| Cardiac rate, beats/min, median (IQR)        | 136 (120.5-152)  | 110 (100-122)  | <0.001 |
| Systolic blood pressure, mmHg, median (IQR)  | 90 (84-98)       | 90 (90-100)    | 0.003  |
| Diastolic blood pressure, mmHg, median (IQR) | 60 (56-68)       | 60 (54.5-60)   | 0.03   |
| Arterial oxygen saturation, %, median (IQR)  | 95 (92-97)       | 99 (97-100)    | <0.001 |

---

NOTE: † Reported as number/number with available data (%), ‡ For the current illness, HIV: Human immunodeficiency virus,

IQR: Interquartile range, PCV: Pneumococcal conjugate vaccine, SD: Standard deviation

**Supplementary Material Table 3. Description of study population by site and group, n=1,758, the GABRIEL Network pneumonia study, 2010 through 2014**

| Characteristics                     | Cambodia       |                 | China        |                  | Haïti         |                  | India Lucknow |                 | India Pune/Vadu |                 | Madagascar   |                 | Mali          |                 | Mongolia      |                 | Paraguay     |                  |
|-------------------------------------|----------------|-----------------|--------------|------------------|---------------|------------------|---------------|-----------------|-----------------|-----------------|--------------|-----------------|---------------|-----------------|---------------|-----------------|--------------|------------------|
|                                     | Cases (n=176)  | Controls (n=96) | Cases (n=39) | Controls (n=138) | Cases (n=101) | Controls (n=122) | Cases (n=96)  | Controls (n=96) | Cases (n=71)    | Controls (n=70) | Cases (n=80) | Controls (n=62) | Cases (n=118) | Controls (n=93) | Cases (n=108) | Controls (n=93) | Cases (n=99) | Controls (n=100) |
| <b>Date of inclusion, median</b>    | 30/01/11       | 24/01/11        | 20/12/11     | 05/07/11         | 22/04/13      | 12/06/13         | 07/02/13      | 19/02/13        | 10/04/13        | 26/06/13        | 20/09/11     | 03/04/12        | 14/11/12      | 10/11/11        | 09/03/12      | 28/03/12        | 25/11/11     | 22/11/11         |
| Minimum                             | 21/10/10       | 3/11/10         | 17/02/11     | 04/08/10         | 24/04/12      | 26/04/12         | 07/08/12      | 07/08/12        | 23/06/12        | 25/06/12        | 17/01/11     | 29/12/10        | 04/07/11      | 11/07/11        | 22/09/11      | 07/10/11        | 18/05/10     | 14/09/10         |
| Maximum                             | 02/01/13       | 21/3/11         | 15/08/12     | 14/12/12         | 06/11/13      | 24/10/13         | 06/12/13      | 13/08/13        | 05/03/14        | 03/06/14        | 15/02/13     | 13/08/13        | 20/12/11      | 27/12/12        | 25/10/12      | 30/10/12        | 20/05/13     | 27/05/13         |
| <b>Categorical variables, n (%)</b> |                |                 |              |                  |               |                  |               |                 |                 |                 |              |                 |               |                 |               |                 |              |                  |
| Gender, male                        | 110/176 (62.5) | 41/95 (43.2)    | 28/39 (71.8) | 82/138 (59.4)    | 58/101 (57.4) | 68/122 (55.7)    | 63/96 (65.6)  | 57/96 (59.4)    | 42/71 (59.2)    | 43/70 (61.4)    | 43/80 (53.8) | 38/60 (63.3)    | 61/118 (51.7) | 57/93 (61.3)    | 66/108 (61.1) | 55/93 (59.1)    | 56/99 (56.6) | 56/100 (56.0)    |
| Age category                        |                |                 |              |                  |               |                  |               |                 |                 |                 |              |                 |               |                 |               |                 |              |                  |
| 2 to 11 months                      | 70/176 (39.8)  | 32/96 (33.3)    | 17/39 (43.6) | 21/138 (15.2)    | 41/101 (40.6) | 44/122 (36.1)    | 33/96 (34.4)  | 31/96 (32.3)    | 27/71 (38.0)    | 28/70 (40.0)    | 23/80 (28.8) | 27/62 (43.6)    | 56/118 (47.5) | 51/93 (54.8)    | 27/108 (25.0) | 24/93 (25.8)    | 39/99 (39.4) | 37/100 (37.0)    |
| 12 to 23 months                     | 63/176 (35.8)  | 31/96 (32.3)    | 8/39 (20.5)  | 26/138 (18.8)    | 30/101 (29.7) | 40/122 (32.8)    | 15/96 (15.6)  | 24/96 (13.5)    | 24/71 (33.8)    | 22/70 (31.4)    | 26/80 (32.5) | 18/62 (29.0)    | 22/118 (18.6) | 19/93 (20.4)    | 36/108 (33.3) | 33/93 (35.5)    | 32/99 (32.3) | 37/100 (37.0)    |
| 24 to 60 months                     | 43/176 (24.4)  | 33/96 (34.4)    | 14/39 (35.9) | 91/138 (65.9)    | 30/101 (29.7) | 38/122 (31.2)    | 48/96 (50.0)  | 52/96 (54.2)    | 20/71 (28.2)    | 20/70 (28.6)    | 31/80 (38.8) | 17/62 (27.4)    | 40/118 (33.9) | 23/93 (24.7)    | 45/108 (41.7) | 36/93 (38.7)    | 28/99 (28.3) | 26/100 (26.0)    |
| Quarter                             |                |                 |              |                  |               |                  |               |                 |                 |                 |              |                 |               |                 |               |                 |              |                  |
| January through March               | 45/176 (25.6)  | 69/96 (71.9)    | 18/39 (46.2) | 19/138 (13.8)    | 9/100 (9.0)   | 19/119 (16.0)    | 23/96 (24.0)  | 19/96 (19.8)    | 11/71 (15.5)    | 10/70 (14.3)    | 28/80 (35.0) | 16/61 (26.2)    | 28/118 (23.7) | 9/93 (9.7)      | 30/108 (27.8) | 24/93 (25.8)    | 10/99 (10.1) | 10/99 (10.1)     |
| April through June                  | 25/176 (14.2)  | 0/96 (0.0)      | 10/39 (25.6) | 29/138 (21.0)    | 42/100 (42.0) | 37/119 (31.1)    | 22/96 (22.9)  | 25/96 (26.0)    | 6/71 (8.4)      | 8/70 (11.4)     | 11/80 (13.8) | 21/61 (34.4)    | 12/118 (10.2) | 9/93 (9.7)      | 21/108 (19.4) | 20/93 (21.5)    | 31/99 (31.3) | 31/99 (31.3)     |
| July through September              | 4/176 (2.3)    | 0/96 (0.0)      | 4/39 (10.3)  | 46/138 (33.3)    | 20/100 (20.0) | 29/119 (24.4)    | 24/96 (25.0)  | 26/96 (27.1)    | 34/71 (47.9)    | 36/70 (51.4)    | 25/80 (31.3) | 16/61 (26.2)    | 55/118 (46.6) | 20/93 (21.5)    | 21/108 (19.4) | 19/93 (20.4)    | 34/99 (34.3) | 28/99 (28.3)     |
| October through December            | 102/176 (58.0) | 27/96 (28.1)    | 7/39 (18.0)  | 44/138 (31.9)    | 29/100 (29.0) | 34/119 (28.6)    | 27/96 (28.1)  | 26/96 (27.1)    | 20/71 (28.2)    | 16/70 (22.9)    | 16/80 (20.0) | 8/61 (13.1)     | 23/118 (19.5) | 55/93 (59.1)    | 36/108 (33.3) | 30/93 (32.3)    | 24/99 (24.2) | 30/99 (30.3)     |

NOTE: DPT-HBV-Hib, Diphtheria, Tetanus, Pertussis, Hepatitis B, Polio and *Hemophilus influenzae* type b; SD, standard deviation

Supplementary Material Table 3 continued. Description of study population by country and group, n = 1,758, the GABRIEL Network pneumonia study, 2010 through 2014

| Characteristics                                    | Cambodia      |                 | China        |                  | Haïti         |                  | India Lucknow |                 | India Pune/Vadu |                 | Madagascar   |                 | Mali           |                 | Mongolia       |                 | Paraguay     |                  |
|----------------------------------------------------|---------------|-----------------|--------------|------------------|---------------|------------------|---------------|-----------------|-----------------|-----------------|--------------|-----------------|----------------|-----------------|----------------|-----------------|--------------|------------------|
|                                                    | Cases (n=176) | Controls (n=96) | Cases (n=39) | Controls (n=138) | Cases (n=101) | Controls (n=122) | Cases (n=96)  | Controls (n=96) | Cases (n=71)    | Controls (n=70) | Cases (n=80) | Controls (n=62) | Cases (n=118)  | Controls (n=93) | Cases (n=108)  | Controls (n=93) | Cases (n=99) | Controls (n=100) |
| <b>Categorical variables, n (%)</b>                |               |                 |              |                  |               |                  |               |                 |                 |                 |              |                 |                |                 |                |                 |              |                  |
| HIV-positive                                       | 0/178 (0.0)   | 0/96 (0.0)      | 0/39 (0.0)   | 0/138 (0.0)      | 6/100 (6.0)   | 8/119 (6.7)      | 0/96 (0.0)    | 0/96 (0.0)      | 0/71 (0.0)      | 0/70 (0.0)      | 0/50 (0.0)   | 1/35 (2.9)      | 3/118 (2.5)    | 0/93 (0.0)      | 0/108 (0.0)    | 0/93 (0.0)      | No data      | 1/79 (1.3)       |
| Heart disease                                      | 4/176 (2.3)   | No data         | 3/39 (7.7)   | 0/138 (0.0)      | 1/100 (1.0)   | 0/121 (0.0)      | 9/96 (9.4)    | 0/96 (0.0)      | 5/71 (7.0)      | 0/70 (0.0)      | 2/79 (2.5)   | 2/61 (3.3)      | 4/118 (3.4)    | 0/93 (0.0)      | 3/108 (2.8)    | 0/93 (0.0)      | 8/99 (8.1)   | 9/95 (9.5)       |
| Weight-for-height Z-score ≤ 2 SD                   | 34/159 (21.4) | 10/92 (10.9)    | 3/39 (7.7)   | 6/137 (4.4)      | 35/101 (34.6) | 22/121 (18.2)    | No data       | 39/96 (40.6)    | 30/71 (42.2)    | 12/70 (17.1)    | 37/80 (46.2) | 24/59 (40.7)    | 41/118 (34.7)  | 41/93 (44.1)    | 3/105 (2.8)    | 2/93 (2.2)      | 17/99 (17.2) | 5/74 (6.8)       |
| Pneumococcal conjugate vaccine                     | No data       | No data         | No data      | No data          | 1/101 (1.0)   | 0/122 (0.0)      | 0/96 (0.0)    | 27/96 (28.1)    | 1/47 (2.1)      | 0/49 (0.0)      | 3/73 (4.1)   | 2/52 (3.9)      | 0/118 (0.0)    | 0/93 (0.0)      | 0/108 (0.0)    | 0/93 (0.0)      | 16/71 (22.5) | 22/79 (27.9)     |
| DPT-HBV-Hib vaccine, at least one dose             | No data       | No data         | No data      | No data          | 66/69 (95.7)  | 99/101 (98.0)    | 2/96 (2.1)    | 48/96 (50.0)    | 59/71 (83.1)    | 61/70 (87.1)    | 69/72 (95.8) | 53/53 (100.0)   | 102/118 (86.4) | 81/93 (87.1)    | 107/108 (99.1) | 92/93 (98.9)    | 65/66 (98.5) | 82/86 (95.4)     |
| DPT-HBV-Hib vaccine, three doses                   | No data       | No data         | No data      | No data          | 44/64 (68.8)  | 80/101 (79.2)    | 2/96 (2.1)    | 23/96 (24.0)    | 47/71 (66.2)    | 52/70 (74.3)    | 64/71 (90.1) | 48/53 (90.6)    | 81/118 (68.6)  | 69/93 (74.2)    | 103/108 (95.4) | 92/93 (98.9)    | 51/52 (98.1) | 60/83 (72.3)     |
| Influenza vaccine in 2009                          | No data       | No data         | No data      | No data          | 0/3 (0.0)     | 0/122 (0.0)      | 0/96 (0.0)    | 0/96 (0.0)      | 0/71 (0.0)      | 0/70 (0.0)      | 0/73 (0.0)   | 1/48 (2.1)      | 1/118 (0.8)    | 0/93 (0.0)      | 0/108 (0.0)    | 0/93 (0.0)      | 19/63 (30.2) | 29/71 (40.9)     |
| Prior antibiotic treatment for the current illness | No data       | 71/93 (76.3)    | 37/38 (97.4) | 105/138 (76.1)   | 12/100 (12.0) | 0/113 (0.0)      | 93/96 (96.9)  | No data         | 71/71 (100.0)   | 2/29 (6.9)      | 40/73 (54.8) | 15/60 (25.0)    | 101/116 (87.1) | 5/93 (5.4)      | 74/108 (68.5)  | 0/93 (0.0)      | 15/99 (15.2) | 3/100 (3.0)      |
| Urinary detection of antibiotics (cases only)      | 89/160 (55.6) | -               | 28/39 (71.8) | -                | 18/79 (22.8)  | -                | 96/96 (100.0) | -               | 70/70 (100.0)   | -               | 43/70 (61.4) | -               | 41/63 (65.1)   | -               | 97/107 (90.7)  | -               | No data      | -                |
| <b>Continuous variables, mean (± SD)</b>           |               |                 |              |                  |               |                  |               |                 |                 |                 |              |                 |                |                 |                |                 |              |                  |
| Age, months                                        | 16.9 (11.3)   | 22.4 (17.8)     | 19.6 (17.0)  | 29.8 (16.6)      | 18.9 (13.6)   | 20.0 (13.7)      | 26.1 (19.7)   | 27.4 (19.9)     | 17.6 (12.2)     | 19.2 (13.9)     | 22.2 (14.6)  | 17.1 (12.6)     | 17.7 (14.7)    | 14.8 (12.7)     | 23.5 (14.6)    | 22.9 (14.5)     | 17.8 (13.1)  | 16.9 (13.2)      |
| Weight-for-height Z-score                          | -1.1 (1.4)    | -0.6 (1.6)      | 0.1 (2.0)    | 0.2 (1.5)        | -1.6 (1.6)    | -0.7 (1.6)       | No data       | -2.0 (1.4)      | -1.8 (1.5)      | -0.8 (1.3)      | -2.0 (1.4)   | -1.8 (1.5)      | -1.7 (1.7)     | -2.0 (1.7)      | 0.2 (1.0)      | -1.0 (4.9)      | -0.3 (1.8)   | 0.0 (1.3)        |

Abbreviations: DPT-HBV-Hib, Diphtheria, Tetanus, Pertussis, Hepatitis B, Polio, and *Haemophilus influenzae* type b; SD, standard deviation

**Supplementary Material Table 4. Microorganisms detection in nasopharyngeal samples of pneumonia cases and controls, the GABRIEL Network pneumonia study, 2010 through 2014**

|                                                          | Cases, nasopharyngeal swabs, n=888 | Controls, nasopharyngeal swabs, n=870 | p-value |
|----------------------------------------------------------|------------------------------------|---------------------------------------|---------|
| <b>Number of patients with bacteria detection, n (%)</b> |                                    |                                       |         |
| <i>Streptococcus pneumoniae</i>                          | 605 (68.1)                         | 412 (47.4)                            | <0.001  |
| <i>Staphylococcus aureus</i>                             | 107 (12.1)                         | 148 (17.0)                            | 0.003   |
| <i>Haemophilus influenzae</i>                            | 47 (5.3)                           | 57 (6.6)                              | 0.26    |
| <i>Mycoplasma pneumoniae</i>                             | 13 (1.5)                           | 6 (0.7)                               | 0.12    |
| <i>Chlamydomphila pneumoniae</i>                         | 4 (0.5)                            | 2 (0.2)                               | 0.69    |
| <b>Number of patients with viral detection, n (%)</b>    |                                    |                                       |         |
| Rhinovirus                                               | 221 (24.9)                         | 188 (21.6)                            | 0.10    |
| Respiratory Syncytial Virus A/B                          | 178 (20.1)                         | 34 (3.9)                              | <0.001  |
| Bocavirus                                                | 82 (9.2)                           | 104 (12.0)                            | 0.064   |
| Parainfluenza virus 1/2/3/4                              | 104 (11.7)                         | 44 (5.1)                              | <0.001  |
| Coronavirus NL63/229E/OC43/HKU1                          | 59 (6.6)                           | 74 (8.5)                              | 0.14    |
| Adenovirus                                               | 68 (7.7)                           | 65 (7.5)                              | 0.88    |
| Influenza virus A/A(H1N1)/B                              | 86 (9.7)                           | 15 (1.7)                              | <0.001  |
| Human Metapneumovirus A/B                                | 76 (8.6)                           | 10 (1.2)                              | <0.001  |
| Enterovirus                                              | 42 (4.7)                           | 38 (4.4)                              | 0.72    |
| Parechovirus                                             | 21 (2.4)                           | 13 (1.5)                              | 0.19    |

**Supplementary Material Table 5. Description of viruses detected in nasopharyngeal samples of pneumonia cases and controls when a virus-bacteria co-detection was found, the GABRIEL Network pneumonia study, 2010 through 2014**

|                                                                                     | Total<br>n=816                                        | Cases<br>n=527                      | Controls<br>n=289                                        | p-value |
|-------------------------------------------------------------------------------------|-------------------------------------------------------|-------------------------------------|----------------------------------------------------------|---------|
| <b>Number of virus detected when a virus/bacteria co-detection was found, n (%)</b> |                                                       |                                     |                                                          |         |
| 1 virus + bacteria                                                                  | 578 (70.8)                                            | 380 (72.1)                          | 198 (68.5)                                               | 0.28    |
| 2 virus + bacteria                                                                  | 187 (22.9)                                            | 115 (21.8)                          | 72 (24.9)                                                | 0.31    |
| 3 virus + bacteria                                                                  | 37 (4.5)                                              | 27 (5.1)                            | 10 (3.5)                                                 | 0.27    |
| 4 virus + bacteria                                                                  | 12 (1.2)                                              | 4 (0.8)                             | 8 (2.8)                                                  | 0.03    |
| 5 virus + bacteria                                                                  | 2 (0.2)                                               | 1 (0.2)                             | 1 (0.3)                                                  | 0.99    |
| <b>Genus of virus detected when a virus/bacteria co-detection was found, n (%)</b>  |                                                       |                                     |                                                          |         |
|                                                                                     | Total with<br>virus/bacteria<br>co-detection<br>n=816 | Cases with<br>co-detection<br>n=527 | Controls with<br>virus/bacteria<br>co-detection<br>n=289 | p-value |
| Rhinovirus                                                                          | 259 (31.7)                                            | 150 (28.5)                          | 109 (37.7)                                               | 0.007   |
| Respiratory Syncytial Virus A/B                                                     | 136 (16.7)                                            | 121 (23.0)                          | 15 (5.2)                                                 | <.001   |
| Bocavirus                                                                           | 129 (15.8)                                            | 60 (11.4)                           | 69 (23.9)                                                | <.001   |
| Parainfluenza virus 1/2/3/4                                                         | 93 (11.4)                                             | 66 (12.5)                           | 27 (9.3)                                                 | 0.171   |
| Coronavirus NL63/229E/OC43/HKU1                                                     | 86 (10.5)                                             | 47 (8.9)                            | 39 (13.5)                                                | 0.042   |



|                             |            |           |           |        |
|-----------------------------|------------|-----------|-----------|--------|
| Adenovirus                  | 100 (12.3) | 54 (10.3) | 46 (15.9) | 0.018  |
| Influenza virus A/A(H1N1)/B | 64 (7.8)   | 58 (11.0) | 6 (2.1)   | <.001  |
| Human Metapneumovirus A/B   | 54 (6.6)   | 48 (9.1)  | 6 (2.1)   | <0.001 |
| Enterovirus                 | 56 (6.9)   | 35 (6.6)  | 21 (7.3)  | 0.736  |
| Parechovirus                | 23 (2.8)   | 17 (3.2)  | 6 (2.1)   | 0.343  |

---

**Supplementary Material Table 6. Site-stratified adjusted odds ratio of pneumonia according to the microorganisms detected in nasopharyngeal samples, the GABRIEL Network, 2010 through 2014**

**Cambodia**

|                             | aOR of the risk of pneumonia for the detection of the virus without <i>S.pneumoniae</i> (95% CI) | p-value | aOR of the risk of pneumonia for the co-detection virus + <i>S.pneumoniae</i> (95% CI) | p-value |
|-----------------------------|--------------------------------------------------------------------------------------------------|---------|----------------------------------------------------------------------------------------|---------|
| Rhinovirus                  | 3.35 (1.45-7.76)                                                                                 | 0.061   | 4.94 (1.54-15.85)                                                                      | 0.007   |
| Respiratory Syncytial Virus | 19.95 (4.82-82.60)                                                                               | 0.061   | 23.48 (4.99-110.34)                                                                    | <0.001  |
| Parainfluenza virus         | 3.95 (0.94-16.60)                                                                                | 0.061   | 7.57 (1.40-40.93)                                                                      | 0.019   |
| Influenza virus             | 3.38 (0.47-24.22)                                                                                | 0.226   | 4.51 (0.50-40.91)                                                                      | 0.181   |
| Human Metapneumovirus       | 4.47 (1.15-17.40)                                                                                | 0.031   | 6.50 (1.27-33.14)                                                                      | 0.024   |

**China**

|                             | aOR of the risk of pneumonia for the detection of the virus without <i>S.pneumoniae</i> (95% CI) | p-value | aOR of the risk of pneumonia for the co-detection virus + <i>S.pneumoniae</i> (95% CI) | p-value |
|-----------------------------|--------------------------------------------------------------------------------------------------|---------|----------------------------------------------------------------------------------------|---------|
| Rhinovirus                  | 0.60 (0.25-1.45)                                                                                 | 0.259   | 1.06 (0.30-3.78)                                                                       | 0.929   |
| Respiratory Syncytial Virus | 7.45 (2.58-21.53)                                                                                | <0.001  | 7.93 (1.37-46.04)                                                                      | 0.021   |
| Parainfluenza virus         | 0.53 (0.16-1.79)                                                                                 | 0.313   | 2.03 (0.40-10.35)                                                                      | 0.394   |
| Influenza virus             | 2.17 (0.43-10.91)                                                                                | 0.349   | 5.81 (0.42-81.32)                                                                      | 0.191   |
| Human Metapneumovirus       | NA                                                                                               | NA      | NA                                                                                     | NA      |

**Supplementary Material Table 6. Site-stratified adjusted odds ratio of pneumonia according to the microorganisms detected in nasopharyngeal samples, the GABRIEL Network, 2010 through 2014**

**Haiti**

|                             | aOR of the risk of pneumonia for the detection of the virus without <i>S.pneumoniae</i> (95% CI) | p-value | aOR of the risk of pneumonia for the co-detection virus + <i>S.pneumoniae</i> (95% CI) | p-value |
|-----------------------------|--------------------------------------------------------------------------------------------------|---------|----------------------------------------------------------------------------------------|---------|
| Rhinovirus                  | 1.28 (0.56-2.94)                                                                                 | 0.564   | 4.77 (1.54-14.81)                                                                      | 0.007   |
| Respiratory Syncytial Virus | 83.54 (10.59-658-78)                                                                             | <0.001  | 235.90 (26.25-2120.02)                                                                 | <0.001  |
| Parainfluenza virus         | 7.29 (2.17-24.44)                                                                                | 0.001   | 46.31 (8.09-265.13)                                                                    | <0.001  |
| Influenza virus             | NA                                                                                               | NA      | NA                                                                                     | NA      |
| Human Metapneumovirus       | 1.94 (0.13-29.17)                                                                                | 0.633   | 2.94 (0.12-69.87)                                                                      | 0.505   |

**India Lucknow**

|                             | aOR of the risk of pneumonia for the detection of the virus without <i>S.pneumoniae</i> (95% CI) | p-value | aOR of the risk of pneumonia for the co-detection virus + <i>S.pneumoniae</i> (95% CI) | p-value |
|-----------------------------|--------------------------------------------------------------------------------------------------|---------|----------------------------------------------------------------------------------------|---------|
| Rhinovirus                  | 1.41 (0.74-2.69)                                                                                 | 0.299   | 1.07 (0.42-2.74)                                                                       | 0.880   |
| Respiratory Syncytial Virus | 3.22 (0.75-13.82)                                                                                | 0.116   | 1.39 (0.16-11.73)                                                                      | 0.740   |
| Parainfluenza virus         | 10.24 (2.14-48.89)                                                                               | 0.004   | NA                                                                                     | NA      |
| Influenza virus             | 9.98 (2.04-48.75)                                                                                | 0.004   | NA                                                                                     | NA      |
| Human Metapneumovirus       | 0.85 (0.10-6.95)                                                                                 | 0.881   | NA                                                                                     | NA      |

**Supplementary Material Table 6 (continued). Site-stratified adjusted odds ratio of pneumonia according to the microorganisms detected in nasopharyngeal samples, the GABRIEL Network, 2010 through 2014**

**India Pune/Vadu**

|                             | aOR of the risk of pneumonia for the detection of the virus without <i>S.pneumoniae</i> (95% CI) | p-value | aOR of the risk of pneumonia for the co-detection virus + <i>S.pneumoniae</i> (95% CI) | p-value |
|-----------------------------|--------------------------------------------------------------------------------------------------|---------|----------------------------------------------------------------------------------------|---------|
| Rhinovirus                  | 2.20 (0.91-5.31)                                                                                 | 0.08    | 9.88 (2.14-45.66)                                                                      | 0.003   |
| Respiratory Syncytial Virus | 7.14 (1.71-29.83)                                                                                | 0.007   | 15.65 (2.23-109.71)                                                                    | 0.006   |
| Parainfluenza virus         | 10.64 (1.23-92.16)                                                                               | 0.032   | 11.91 (1.20-118.08)                                                                    | 0.034   |
| Influenza virus             | NA                                                                                               | NA      | NA                                                                                     | NA      |
| Human Metapneumovirus       | NA                                                                                               | NA      | NA                                                                                     | NA      |

**Madagascar**

|                             | aOR of the risk of pneumonia for the detection of the virus without <i>S.pneumoniae</i> (95% CI) | p-value | aOR of the risk of pneumonia for the co-detection virus + <i>S.pneumoniae</i> (95% CI) | p-value |
|-----------------------------|--------------------------------------------------------------------------------------------------|---------|----------------------------------------------------------------------------------------|---------|
| Rhinovirus                  | 0.64 (0.28-1.50)                                                                                 | 0.31    | 1.75 (0.54-5.72)                                                                       | 0.353   |
| Respiratory Syncytial Virus | 7.58 (1.20-47.86)                                                                                | 0.031   | NA                                                                                     | NA      |
| Parainfluenza virus         | 4.01 (0.89-18.02)                                                                                | 0.070   | 11.35 (1.73-74.59)                                                                     | 0.011   |
| Influenza virus             | 2.38 (0.33-17.24)                                                                                | 0.392   | 11.69 (0.71-191.85)                                                                    | 0.085   |
| Human Metapneumovirus       | 4.97 (0.51-47.91)                                                                                | 0.166   | 10.57 (0.94-118.76)                                                                    | 0.056   |

**Supplementary Material Table 6 (continued). Site-stratified adjusted odds ratio of pneumonia according to the microorganisms detected in nasopharyngeal samples, the GABRIEL Network, 2010 through 2014**

**Mali**

|                             | aOR of the risk of pneumonia for the detection of the virus without <i>S.pneumoniae</i> (95% CI) | p-value | aOR of the risk of pneumonia for the co-detection virus + <i>S.pneumoniae</i> (95% CI) | p-value |
|-----------------------------|--------------------------------------------------------------------------------------------------|---------|----------------------------------------------------------------------------------------|---------|
| Rhinovirus                  | 1.04 (0.53-2.07)                                                                                 | 0.904   | 2.66 (1.06-6.68)                                                                       | 0.038   |
| Respiratory Syncytial Virus | 8.93 (3.24-24.64)                                                                                | <0.001  | 33.31 (6.67-166.45)                                                                    | <0.001  |
| Parainfluenza virus         | 1.82 (0.62-5.35)                                                                                 | 0.278   | 3.76 (1.00-14.25)                                                                      | 0.050   |
| Influenza virus             | 19.54 (2.25-170.10)                                                                              | 0.007   | NA                                                                                     | NA      |
| Human Metapneumovirus       | 12.70 (1.53-105.50)                                                                              | 0.019   | NA                                                                                     | NA      |

**Mongolia**

|                             | aOR of the risk of pneumonia for the detection of the virus without <i>S.pneumoniae</i> (95% CI) | p-value | aOR of the risk of pneumonia for the co-detection virus + <i>S.pneumoniae</i> (95% CI) | p-value |
|-----------------------------|--------------------------------------------------------------------------------------------------|---------|----------------------------------------------------------------------------------------|---------|
| Rhinovirus                  | 2.33 (0.82-6.66)                                                                                 | 0.114   | 29.62 (6.17-142.08)                                                                    | <0.001  |
| Respiratory Syncytial Virus | 2.54 (0.84-7.68)                                                                                 | 0.098   | 35.81 (6.40-200.44)                                                                    | <0.001  |
| Parainfluenza virus         | 19.72 (2.22-175.28)                                                                              | 0.007   | NA                                                                                     | NA      |
| Influenza virus             | NA                                                                                               | NA      | NA                                                                                     | NA      |
| Human Metapneumovirus       | NA                                                                                               | NA      | NA                                                                                     | NA      |

**Supplementary Material Table 6 (continued). Site-stratified adjusted odds ratio of pneumonia according to the microorganisms detected in nasopharyngeal samples, the GABRIEL Network, 2010 through 2014**

**Paraguay**

|                             | aOR of the risk of pneumonia for the detection of the virus without <i>S.pneumoniae</i> (95% CI) | p-value | aOR of the risk of pneumonia for the co-detection virus + <i>S.pneumoniae</i> (95% CI) | p-value |
|-----------------------------|--------------------------------------------------------------------------------------------------|---------|----------------------------------------------------------------------------------------|---------|
| Rhinovirus                  | 3.62 (1.65-7.93)                                                                                 | 0.001   | 19.01 (6.33-57.05)                                                                     | <0.001  |
| Respiratory Syncytial Virus | NA                                                                                               | NA      | NA                                                                                     | NA      |
| Parainfluenza virus         | NA                                                                                               | NA      | NA                                                                                     | NA      |
| Influenza virus             | 1.90 (0.32-11.10)                                                                                | 0.478   | 8.66 (0.85-88.55)                                                                      | 0.069   |
| Human Metapneumovirus       | 31.93 (3.18-320.80)                                                                              | 0.003   | 38.62 (2.89-515.99)                                                                    | 0.006   |

NOTE : 95% CI : 95% Confidence Interval, aOR : Adjusted Odds Ratio, NA : Non Applicable

**Supplementary Material Table 7. Microorganisms detected in nasopharyngeal samples of patients with hypoxemic pneumonia, by study site, the GABRIEL Network, 2010 through 2014**

| Number of bacteria detected | Number of virus detected | Bacteria and virus detected | China, n | Haiti, n | India Lucknow, n | India Vadu, n | Madagascar, n | Mali, n | Mongolia, n | Paraguay, n |
|-----------------------------|--------------------------|-----------------------------|----------|----------|------------------|---------------|---------------|---------|-------------|-------------|
| 0                           | 0                        | -                           |          |          | 1                | 2             |               | 2       | 1           | 1           |
| 0                           | 1                        | RV                          |          |          |                  | 2             |               |         |             |             |
|                             |                          | RSV                         |          | 1        |                  | 1             | 1             | 1       |             |             |
|                             |                          | IV                          |          | 1        |                  | 1             |               | 1       |             |             |
|                             |                          | HMPV                        |          |          |                  | 1             |               | 1       |             | 1           |
| 0                           | 2                        | RV + CoV                    |          | 1        |                  |               |               |         |             |             |
|                             |                          | RV + HMPV                   |          |          | 1                |               |               |         |             |             |
|                             |                          | RV + RSV                    |          |          |                  |               |               | 1       |             |             |
|                             |                          | RSV + PIV                   |          | 1        |                  |               |               |         |             |             |
|                             |                          | RSV + IV                    |          |          |                  |               |               | 1       |             |             |
| 0                           | 3                        | RV + HMPV + BoV             | 1        |          |                  |               |               |         |             |             |
| 0                           | 4                        | HMPV + AdV + EV + CoV       |          |          |                  |               |               | 1       |             |             |
| 1                           | 0                        | SP                          |          | 1        |                  | 2             |               | 2       | 1           | 2           |
|                             |                          | STA                         |          |          |                  |               | 1             |         |             | 1           |
| 1                           | 1                        | SP + RV                     |          | 1        |                  | 3             | 1             | 4       | 1           |             |
|                             |                          | SP + RSV                    |          |          |                  | 4             | 1             | 5       |             |             |
|                             |                          | SP + IV                     |          | 1        |                  |               |               |         | 1           |             |
|                             |                          | SP + HMPV                   |          |          |                  | 1             |               |         |             |             |
|                             |                          | SP + PIV                    |          | 1        |                  | 1             |               | 1       |             |             |

|   |   |                 |   |   |   |
|---|---|-----------------|---|---|---|
|   |   | SP + CoV        | 1 |   | 1 |
|   |   | SP + EV         |   | 2 |   |
|   |   | STA + RV        |   |   | 1 |
| 1 | 2 | SP + RV + PIV   | 1 |   |   |
|   |   | SP + HMPV + BoV |   | 1 |   |
|   |   | SP + HMPV + CoV |   |   | 1 |

---



**Supplementary Material Table 7 (continued). Microorganisms detected in nasopharyngeal samples of patients with hypoxemic pneumonia, by study site, the GABRIEL Network, 2010 through 2014**

| Number of bacteria detected | Number of virus detected | Bacteria and virus detected | China, n | Haiti, n | India Lucknow, n | India Vadu, n | Madagascar, n | Mali, n | Mongolia, n | Paraguay, n |
|-----------------------------|--------------------------|-----------------------------|----------|----------|------------------|---------------|---------------|---------|-------------|-------------|
|                             |                          | SP + IV + CoV               |          |          |                  |               |               | 1       |             |             |
|                             |                          | SP + PIV + AdV              |          |          |                  |               |               | 1       |             |             |
|                             |                          | STA + RV + RSV              |          |          |                  |               |               | 1       |             |             |
|                             |                          | STA + HMPV + HPeV           |          |          |                  |               |               |         |             | 1           |
| 1                           | 3                        | SP + HMPV + EV + BoV        |          |          |                  |               |               | 1       |             |             |
| 2                           | 0                        | SP + STA                    |          |          |                  |               |               | 2       |             |             |
|                             |                          | SP + HIB                    |          | 1        |                  |               |               |         |             |             |
|                             |                          | SP + CHLA                   |          | 1        |                  |               |               |         |             |             |
| 2                           | 1                        | SP + STA + PIV              |          |          |                  |               |               | 1       |             |             |
|                             |                          | SP + STA + RSV              |          |          |                  |               |               |         |             | 1           |
| 2                           | 2                        | SP + STA + RV + RSV         |          |          |                  |               |               | 1       |             |             |
|                             |                          | SP + HIB + RV + RSV         |          |          |                  |               |               | 1       |             |             |
|                             |                          | SP + HIB + RV + AdV         |          |          |                  |               |               | 1       |             |             |
|                             |                          | STA + HIB + PIV + BoV       |          |          |                  |               |               | 1       |             |             |
| 2                           | 3                        | SP + STA + PIV + EV + BoV   |          |          |                  |               |               | 1       |             |             |
|                             |                          | SP + HIB + RV + PIV + AdV   |          |          |                  |               |               |         |             | 1           |
| 3                           | 0                        | SP + STA + HIB              |          |          |                  |               |               | 1       |             |             |
| TOTAL                       |                          |                             | 1        | 10       | 2                | 20            | 7             | 36      | 4           | 8           |

NOTE : SP: *Streptococcus pneumoniae*, STA: *Staphylococcus aureus*, HIB: *Haemophilus influenzae* type b, CHLA: *Chlamydophila pneumoniae*, RV : Rhinovirus, RSV : Respiratory Syncytial Virus A/B, BoV : Bocavirus, PIV : Parainfluenza virus 1/2/3/4, CoV : Coronavirus NL63/229E/OC43/HKU1, AdV : Adenovirus, IFV : Influenza virus A/A(H1N1)/B, hMPV: Human Metapneumovirus A/B, EV: Enterovirus, HPeV: Human Parechovirus.
